# Supplementary material
Source: Springer Nature journal article supplement (https://www.springermedizin.de/resource/supplementary/12967_2011_790_MOESM7_ESM.pdf/9577064)

**A**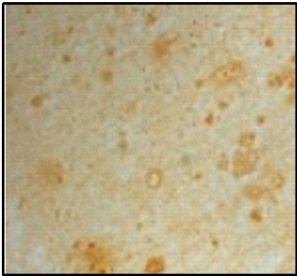**B**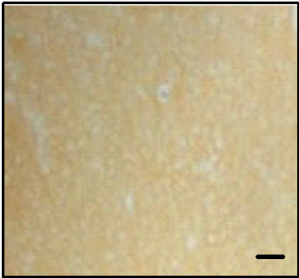**C**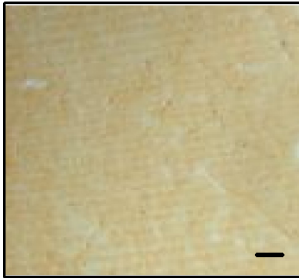

Supplement: MOESM7 [file 9577064]
